# Supplementary material for: Klebsiella oxytoca expands in cancer cachexia and acts as a gut pathobiont contributing to intestinal dysfunction
Source: PubMed Central journal article supplement (PMC6098145; doi:10.1038/s41598-018-30569-5), 2018-08-17
Supplement: 41598_2018_30569_MOESM1_ESM.pdf [file 41598_2018_30569_MOESM1_ESM.pdf]

# ***Klebsiella oxytoca* expands in cancer cachexia and acts as a gut pathobiont contributing to intestinal dysfunction**

**Sarah A. Pötgens<sup>1†</sup>, Hélène Brossel<sup>1†</sup>, Martina Sboarina<sup>1</sup>, Emilie Catry<sup>1</sup>, Patrice D. Cani<sup>1,2</sup>, Audrey M. Neyrinck<sup>1</sup>, Nathalie M. Delzenne<sup>1×</sup>, Laure B. Bindels<sup>1×#</sup>**

<sup>1</sup>Metabolism and Nutrition Research Group, Louvain Drug Research Institute, Université catholique de Louvain, Brussels, Belgium.

<sup>2</sup>Walloon Excellence in Life Sciences and BIOTEchnology (WELBIO), Louvain Drug Research Institute, Université catholique de Louvain, Brussels, Belgium

**# Correspondence:** Laure B. Bindels

[laure.bindels@uclouvain.be](mailto:laure.bindels@uclouvain.be)

†<sup>×</sup> These authors contributed equally to this work.

ORCID: NMD 0000-0003-2115-6082, LBB 0000-0003-3747-3234.

**Running title:** *Klebsiella oxytoca* in cancer cachexia

**Keywords:** cancer cachexia, Proteobacteria, *Enterobacteriaceae*, *Klebsiella oxytoca*, gut barrier, gut microbiota, colonization resistance, PPAR- $\gamma$ .

Figure S1. Co-abundance network illustrating the interactions among bacterial families in the control and cachectic mice (n=13).

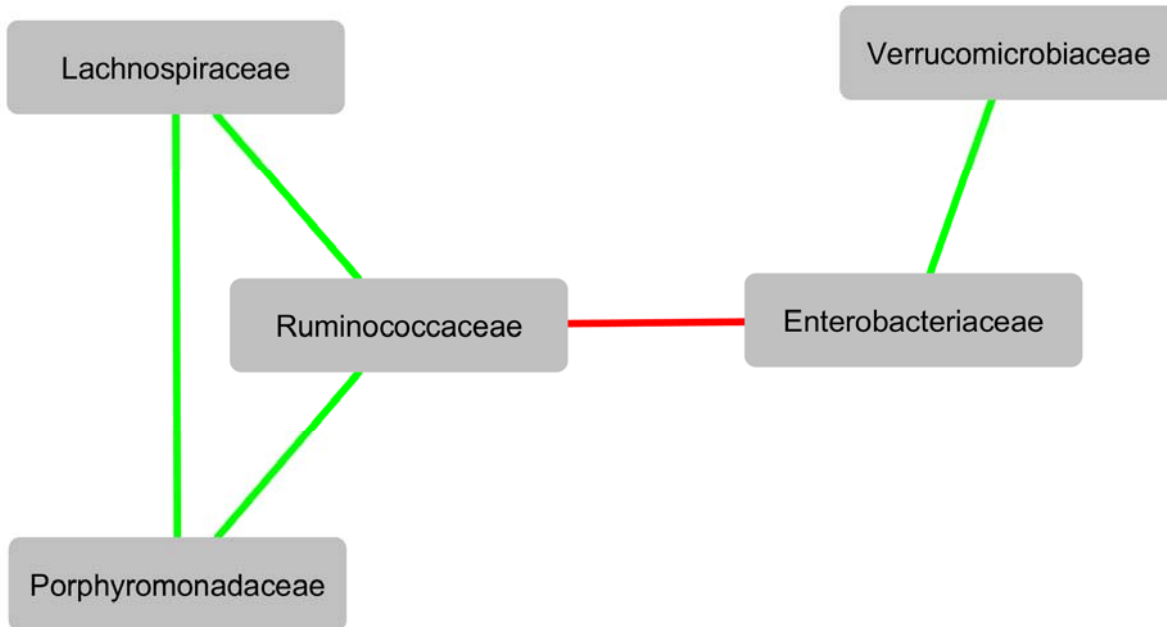

The co-abundance network was built using the CoNet App in Cytoscape following author's tutorial ([http://psbweb05.psb.ugent.be/conet/microbialnetworks/conet\\_new.php](http://psbweb05.psb.ugent.be/conet/microbialnetworks/conet_new.php)). The line connecting two nodes represents the correlation between the connected nodes: green represents a positive correlation, and red represents a negative correlation. Only lines corresponding to correlations with corrected p-value below 0.05 were drawn.

#### Main CoNet parameters

- taxa below a minimum occurrence of 5 across samples were lumped into a garbage taxon.
- 30 top edges
- 100 iterations (methods: Pearson, Spearman, Mutual Information, Bray Curtis and Kullback-Leibler dissimilarity)
- Bootstrapping and p-value merging using the Brown's method
- Benjamini-Hochberg multiple test correction

Figure S2. Cecal *Pparg*, *Nos2*, *Cpt1a*, *Hk2* and *Foxp3* expression in sham-injected mice pair-fed to control mice (PFtoCT) and pair-fed to C26-injected mice (PFtoC26), n = 7-8. Data are presented as mean  $\pm$  SEM. \*\* p < 0.01.

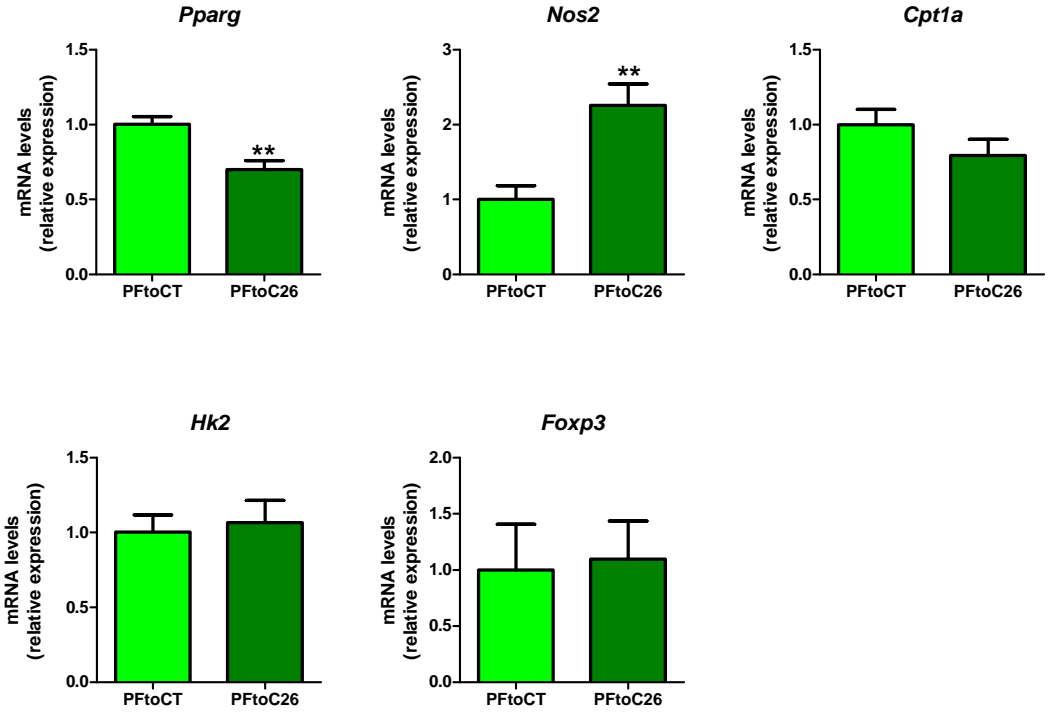

Figure S3. *In vitro* tests to validate the administration mode of *Klebsiella oxytoca* to mice. **(A)** Concentration of live bacteria, in colony-forming units (CFU) per ml of vehicle, of fresh aliquots and after one-week freezing and three-week freezing at -80°C. **(B)** Concentration of live bacteria, in colony-forming units (CFU) per ml of vehicle, over time in a mouse drinking bottle. These graphs are the result of three independent experiments performed in duplicate. Data are presented as mean  $\pm$  SEM.

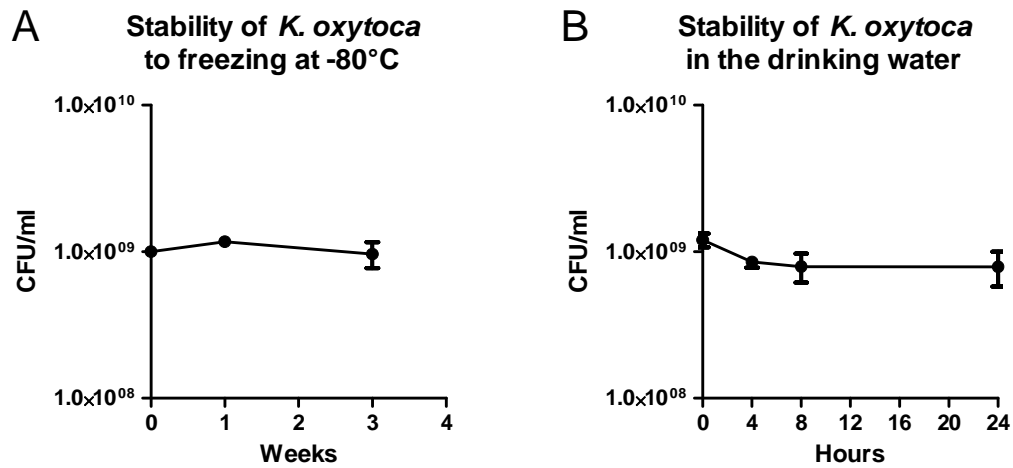

Figure S4. Evaluation of cytotoxin production by the *K. oxytoca* isolate used in the *in vivo* experiment. Viability of HeLa cells incubated in presence of various dilutions of bacterial supernatant was measured by a MTT test and data were expressed as percentage of the signal detected for cells incubated with the same dilution of the bacterial medium, n = 3. Data are presented as mean  $\pm$  SEM.

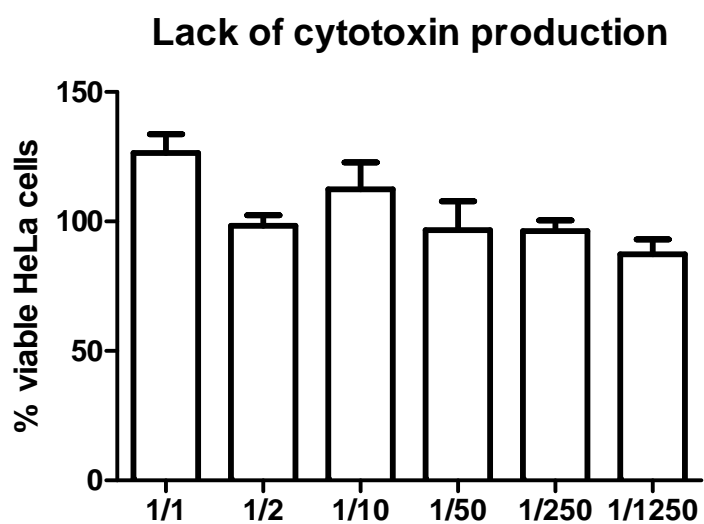

Figure S5. Identity of the bacterium was checked for each batch prepared for *in vivo* administration using PCR with primers targeting *K. oxytoca* and visual inspection of the PCR product on agarose gel. The expected size is 334 bp. K, standard *K. oxytoca* used as inoculate and whose 16S rRNA gene has been sequenced by Sanger sequencing; L1-L6, 6 different lots of bacteria; BI, blank.

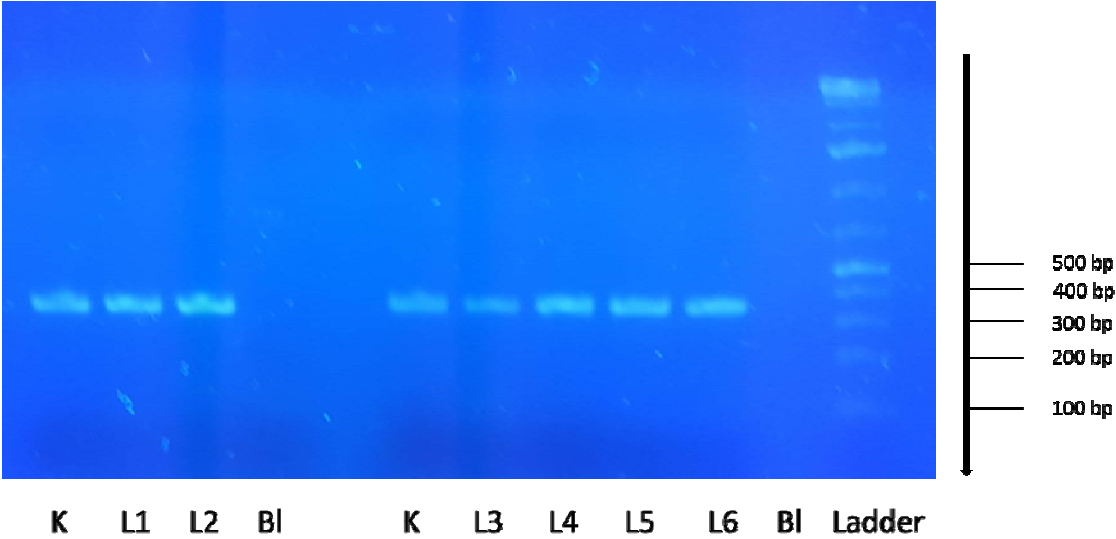

Picture issued from one gel, acquired with a common digital camera. No further processing were applied, beyond a cropping of the borders of the image.

**Table S1.** Relative abundance of bacterial phyla and families in control (CT) and cachectic mice (C26).

| Taxonomic name            | rank   | mean abundance |        | SEM   |       | P-value | Q-value |
|---------------------------|--------|----------------|--------|-------|-------|---------|---------|
|                           |        | (%)            |        | CT    | C26   |         |         |
|                           |        | CT             | C26    |       |       |         |         |
| Firmicutes                | phylum | 56.304         | 19.747 | 1.409 | 2.394 | 0.000   | 0.000   |
| Bacteroidetes             | phylum | 33.892         | 28.650 | 1.209 | 1.411 | 0.017   | 0.061   |
| Verrucomicrobia           | phylum | 6.504          | 26.626 | 0.576 | 1.778 | 0.000   | 0.000   |
| Actinobacteria            | phylum | 0.059          | 0.045  | 0.006 | 0.019 | 0.480   | 0.627   |
| Deferribacteres           | phylum | 1.473          | 3.152  | 0.244 | 0.618 | 0.032   | 0.100   |
| Proteobacteria            | phylum | 0.032          | 21.593 | 0.011 | 4.037 | 0.001   | 0.006   |
| Cyanobacteria/Chloroplast | phylum | 0.002          | 0.002  | 0.001 | 0.002 | 0.900   | 0.900   |
| Lachnospiraceae           | family | 30.111         | 12.748 | 1.232 | 1.665 | 0.000   | 0.000   |
| Ruminococcaceae           | family | 11.838         | 3.959  | 0.428 | 0.673 | 0.000   | 0.000   |
| Clostridiaceae 1          | family | 0.019          | 0.129  | 0.011 | 0.104 | 0.329   | 0.506   |
| Peptostreptococcaceae     | family | 0.000          | 0.001  | 0.000 | 0.001 | 0.351   | 0.506   |
| Lactobacillaceae          | family | 0.618          | 0.247  | 0.147 | 0.065 | 0.064   | 0.186   |
| Enterococcaceae           | family | 0.022          | 0.031  | 0.017 | 0.008 | 0.655   | 0.782   |
| Staphylococcaceae         | family | 0.000          | 0.126  | 0.000 | 0.096 | 0.232   | 0.506   |
| Erysipelotrichaceae       | family | 0.075          | 0.132  | 0.019 | 0.056 | 0.354   | 0.506   |
| Porphyromonadaceae        | family | 33.881         | 28.647 | 1.206 | 1.412 | 0.017   | 0.061   |
| Bacteroidaceae            | family | 0.009          | 0.002  | 0.005 | 0.001 | 0.264   | 0.506   |
| Verrucomicrobiaceae       | family | 6.504          | 26.626 | 0.576 | 1.778 | 0.000   | 0.000   |
| Coriobacteriaceae         | family | 0.056          | 0.044  | 0.006 | 0.018 | 0.545   | 0.672   |
| Micrococcaceae            | family | 0.002          | 0.000  | 0.002 | 0.000 | 0.374   | 0.506   |
| Microbacteriaceae         | family | 0.000          | 0.001  | 0.000 | 0.001 | 0.170   | 0.449   |
| Bifidobacteriaceae        | family | 0.002          | 0.000  | 0.001 | 0.000 | 0.178   | 0.449   |
| Deferribacteraceae        | family | 1.473          | 3.152  | 0.244 | 0.618 | 0.032   | 0.100   |
| Enterobacteriaceae        | family | 0.029          | 21.589 | 0.010 | 4.037 | 0.001   | 0.006   |
| Comamonadaceae            | family | 0.001          | 0.001  | 0.001 | 0.001 | 0.752   | 0.850   |
| Burkholderiaceae          | family | 0.002          | 0.002  | 0.001 | 0.001 | 0.822   | 0.877   |
| Sutterellaceae            | family | 0.000          | 0.001  | 0.000 | 0.001 | 0.351   | 0.506   |
| Chloroplast               | family | 0.002          | 0.002  | 0.001 | 0.002 | 0.900   | 0.900   |

**Table S2.** Identification of bacterial isolates recovered from mesenteric lymph nodes of control (CT), C26 transplanted mice (C26) and C26 transplanted mice receiving *K. oxytoca* in their drinking water (C26-KO) using a selective medium for coliform bacteria.

| <b>Identification/<br/>Prevalence</b> | <b>CT</b> | <b>C26</b> | <b>C26-KO</b> |
|---------------------------------------|-----------|------------|---------------|
| <i>Klebsiella oxytoca</i>             | 0/1       | 2/5        | 4/8           |
| <i>Enterobacter sp.</i>               | 1/1       | 3/5        | 4/8           |



**Table S3.** Primers used in the study.

| Target name                      | Alias/full name                            | Forward                    | Reverse                   |
|----------------------------------|--------------------------------------------|----------------------------|---------------------------|
| <i>RPL19</i> (housekeeping gene) |                                            | GAAGGTCAAAGGGAATGTGTTCA    | CCTTGTCTGCCTTCAGCTTGT     |
| <i>Fbxo32</i>                    | atrogin 1, MAFbx, F-box protein 32         | ATGCACACTGGTGCAGAGAG       | TGTAAGCACACAGGCAGGTC      |
| <i>Ctsl</i>                      | cathepsin L                                | GTGGACTGTTCTCACGCTCAAG     | TCCGTCCTTCGCTTCATAGG      |
| <i>Cd3g</i>                      | CD3g                                       | TCTCTACTGGGCTCTCTCCAA      | CCATCTCCAAGGAAACCAAC      |
| <i>Defa</i>                      | alpha-defensins                            | GGTGATCATGAGACCCCAGCATCAGT | AAGAGACTAAAAGTGGAGGAGCAGC |
| <i>Foxp3</i>                     | forkhead box P3                            | TCCTTCCCAGAGTTCTTCCA       | CGAACATGCGAGTAAACCAA      |
| <i>Hk2</i>                       | hexokinase 2                               | GACCAGAGCATCCTCCTCAA       | CCACATCCAGGTCAAACCTCC     |
| <i>Mki67</i>                     | Ki67                                       | CAGACTTGCTCTGGCCTACC       | GGTTGGCGTTTCTCCTCTTT      |
| <i>Map1lc3a</i>                  | LC3                                        | CACTGCTCTGTCTTGTGTAGGTTG   | TCGTTGTGCCTTATTAGTGCATC   |
| <i>Lgr5</i>                      | Gpr49                                      | TTGGAGAAAGGAGAGCTGGA       | AGTGGGACGATCACGAGAAG      |
| <i>Mmp7</i>                      | Matrix metalloproteinase 7                 | TGTTCCCGTACTGTGATGT        | CACAGCGTGTTCCTCTTCC       |
| <i>Muc2</i>                      | Mucin 2                                    | ATGCCACCTCCTCAAAGAC        | GTAGTTTCCGTTGGAACAGTGAA   |
| <i>Nos2</i>                      | inducible NO synthase                      | AACTGTGTGCCTGGAGGTT        | TCTCTGCCTATCCGTCTCGT      |
| <i>Trim63</i>                    | MuRF1                                      | ACGAGAAGAAGAGCGAGC         | CTTGGCACTTGAGAGGAA        |
| <i>Ocln</i>                      | occludin                                   | ATGTCCGGCCGATGCTCTC        | TTTGGCTGCTCTGGGTCTGTAT    |
| <i>Reg3g</i>                     | regenerating islet derived protein 3 gamma | TTCCTGTCTCCATGATCAAA       | CATCCACCTCTGTTGGGTTT      |
| <i>Tcf4</i>                      | T-cell specific transcription factor 4     | ATGGCAAACAGAGGAACTGG       | GCCTGCTGAGAGTGAAGGAG      |
| <i>Tbx21</i>                     | Tbet                                       | CAGTGTGGAAAGGCAGAAGG       | GGGCTGGTACTTGTGGAGAG      |
| <i>Tjp1</i>                      | ZO1                                        | TTTTTGACAGGGGGAGTGG        | TGCTGCAGAGGTCAAAGTTCAAG   |
| <i>Klebsiella oxytoca</i> *      |                                            | GATACGGAGTATGCCTTTACGGTG   | TAGCCTTATCAAGCGGATACTGG   |

\*as reported by Kovtunovych et al, Res Microbiol 2003, annealing temperature of 59°C.

#### Primers for 16S sequencing by Illumina MiSeq

|                         |                                                                 |
|-------------------------|-----------------------------------------------------------------|
| V5F_Nextera             | TCGTCGGCAGCGTCAGATGTGTATAAGAGACAG <b>RRGATTAGATACCC</b>         |
| V6R_Nextera             | GTCTCGTGGGCTCGGAGATGTGTATAAGAGACAG <b>CGACRRCCATGCANCACTT</b>   |
| Forward indexing primer | <i>AATGATACGGCGACCACCGAGATCTACAC</i> [i5] <i>TCGTCGGCAGCGTC</i> |
| Reverse indexing primer | <i>CAAGCAGAAGACGGCATACGAGAT</i> [i7] <i>GTCTCGTGGGCTCGG</i>     |

16S-specific portion is indicated in bold, and the p5 and p7 flow cell adapters are shown in italics.

#### Primers for 16S sequencing by Sanger

|       |                      |
|-------|----------------------|
| 8F    | AGAGTTTGATCCTGGCTCAG |
| 1391R | GACGGGCGGTGWGTRCA    |
